# Supplementary material for: Mapping global urban land for the 21st century with data-driven simulations and Shared Socioeconomic Pathways
Source: PubMed Central journal article supplement (PMC7210308; doi:10.1038/s41467-020-15788-7), 2020-05-08
Supplement: 41467_2020_15788_MOESM1_ESM.pdf [file 41467_2020_15788_MOESM1_ESM.pdf]

**Supplementary Information:**

**Mapping Global Urban Land for the 21st Century with Data-Driven Simulations and Shared Socioeconomic Pathways**

**Gao & O'Neill**

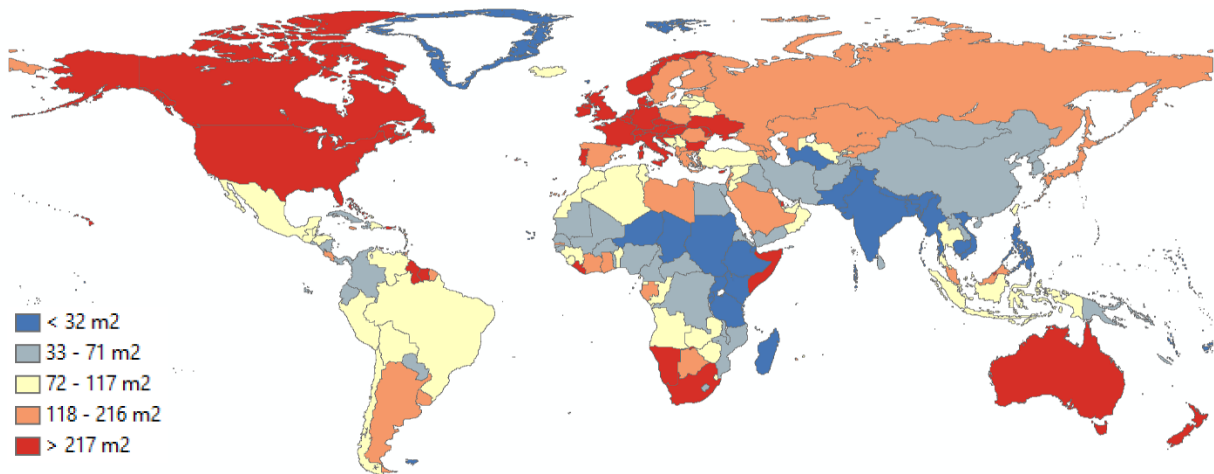

**Supplementary Figure 1. Global quintile map of per capita urban land area (m<sup>2</sup>) in 2000.**

**(Source data are provided as a Source Data file.)**

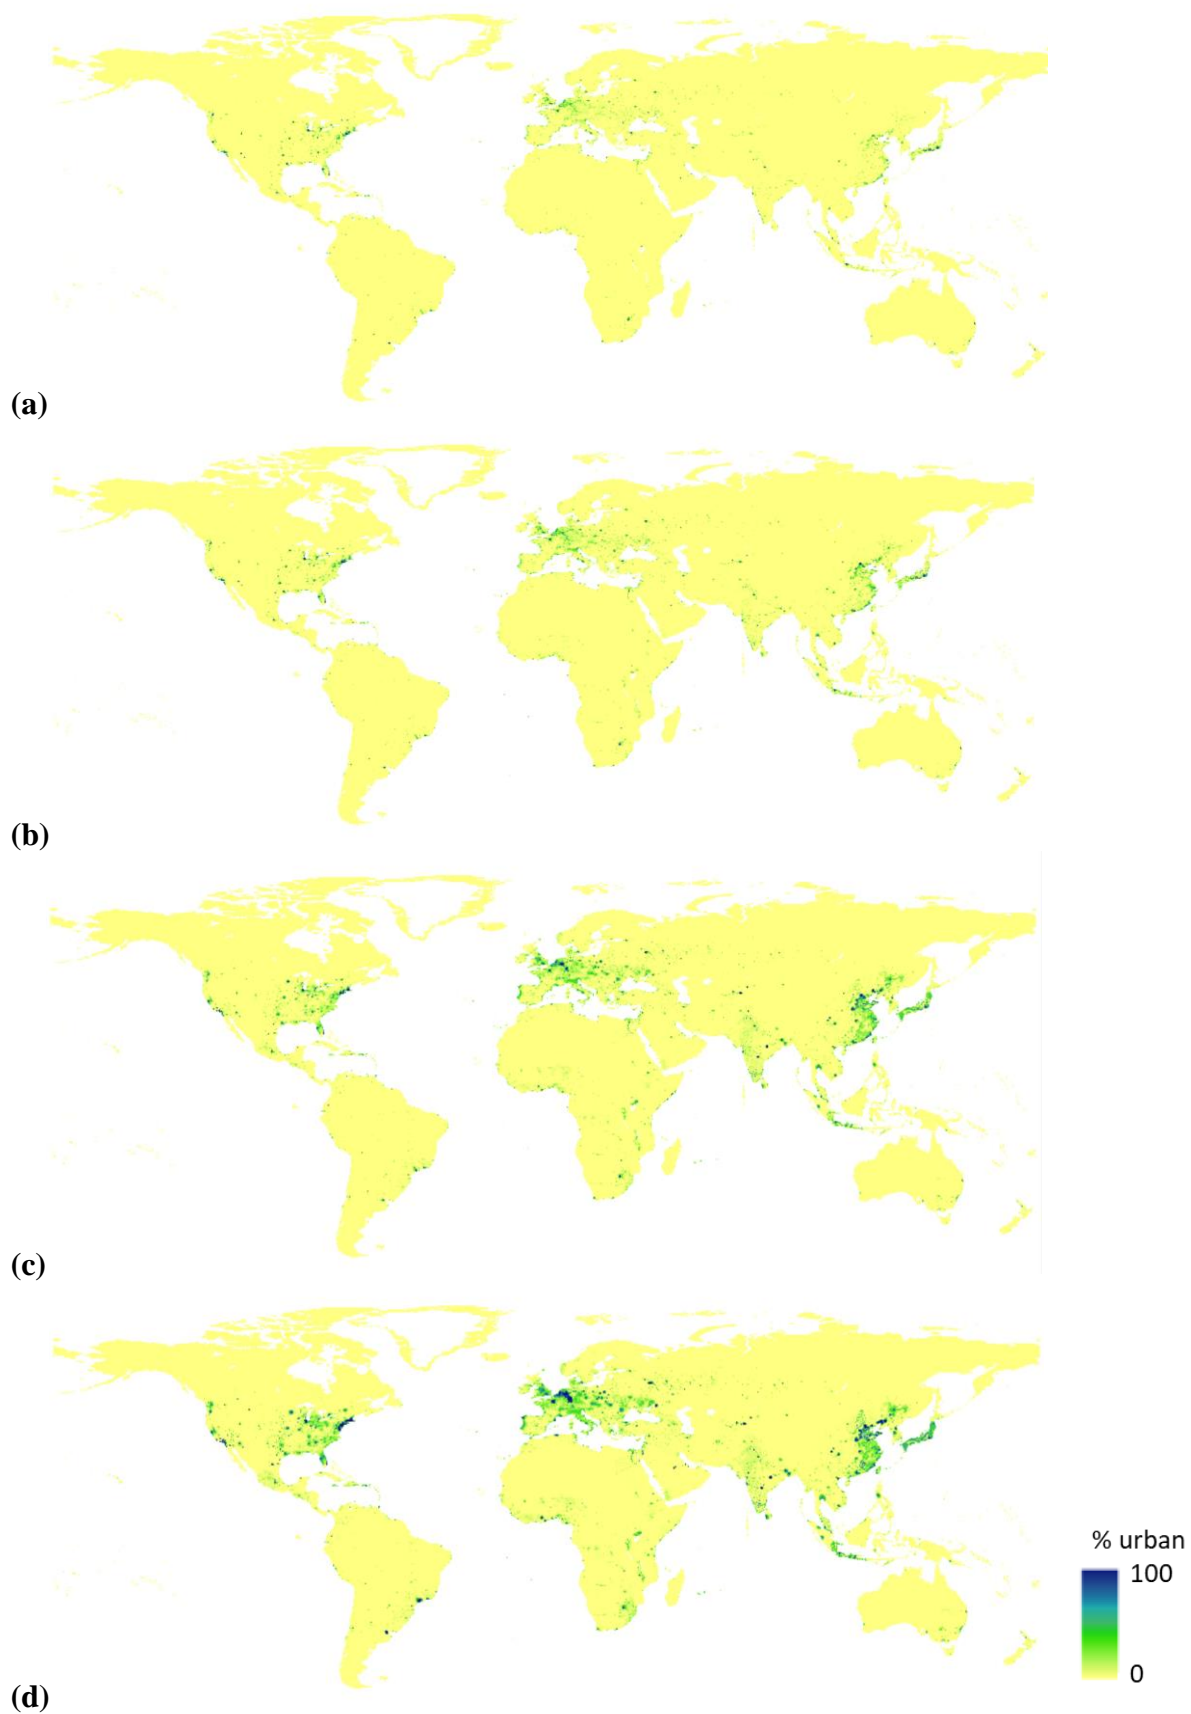

**Supplementary Figure 2. Global urban land maps: (a) base year 2000, (b) sustainability (SSP 1) 2100, (c) middle of the road (SSP 2) 2100, and (d) fossil-fueled development (SSP 5) 2100.**

**Supplementary Table 1. Urban land expansion of world regions over the 21st century.**

**When comparing total urban areas across regions, readers should bear in mind that the regions have different land areas.**

|                            | Base Year 2000                      |                                         | Middle of Road Scenario: 2000-2100 Change    |                                            |                     |                    |                    |              | 2100/2000 urban land ratio (range across scenarios) |
|----------------------------|-------------------------------------|-----------------------------------------|----------------------------------------------|--------------------------------------------|---------------------|--------------------|--------------------|--------------|-----------------------------------------------------|
|                            | total urban land (km <sup>2</sup> ) | per capita urban land (m <sup>2</sup> ) | per capita urban land 2100 (m <sup>2</sup> ) | total urban land change (km <sup>2</sup> ) | urban land change % | total pop change % | urban pop change % | GDP change % |                                                     |
| North America              | 133,611                             | 424                                     | 686                                          | 218,560                                    | 164                 | 63                 | 99                 | 281          | 1.4 - 4.6                                           |
| South & Central America    | 51,373                              | 98                                      | 203                                          | 85,482                                     | 166                 | 28                 | 58                 | 947          | 1.5 - 4.9                                           |
| Europe                     | 144,173                             | 248                                     | 723                                          | 275,285                                    | 191                 | 0                  | 30                 | 321          | 1.6 - 5.0                                           |
| Russia                     | 21,533                              | 147                                     | 490                                          | 38,492                                     | 179                 | -16                | 6                  | 639          | 1.5 - 4.7                                           |
| North Africa & Middle East | 33,736                              | 86                                      | 143                                          | 74,747                                     | 222                 | 94                 | 181                | 1,457        | 1.7 - 5.3                                           |
| Africa                     | 46,067                              | 69                                      | 100                                          | 193,215                                    | 419                 | 260                | 744                | 10,340       | 2.5 - 8.0                                           |
| East & Central Asia        | 113,944                             | 66                                      | 397                                          | 450,839                                    | 396                 | -18                | 59                 | 1,001        | 2.2 - 7.5                                           |
| South & Southeast Asia     | 55,032                              | 32                                      | 125                                          | 253,963                                    | 461                 | 42                 | 252                | 3,450        | 2.7 - 8.4                                           |
| Oceania                    | 11,272                              | 382                                     | 460                                          | 17,815                                     | 158                 | 114                | 164                | 727          | 1.4 - 4.6                                           |
| Global Total               | 610,742                             | 100                                     | 246                                          | 1,608,399                                  | 263                 | 47                 | 152                | 1,035        | 1.8 - 5.9                                           |

**Supplementary Table 2. Urban expansion style evolution of example countries shown by historical data.**

| Nation       | 1990-2000 | 2000-2010 |
|--------------|-----------|-----------|
| Nigeria      | 3         | 2         |
| China        | 3         | 2         |
| India        | 3         | 2         |
| Malaysia     | 2         | 1         |
| South Africa | 2         | 1         |
| Ireland      | 2         | 1         |

(3 – rapidly urbanizing; 2 – steadily urbanizing; 1 – urbanized)

**Supplementary Table 3. Urban expansion style evolution projected for China.**

|       | 2010 | 2020 | 2030 | 2040 | 2050 | 2060 | 2070 | 2080 | 2090 | 2100 |
|-------|------|------|------|------|------|------|------|------|------|------|
| SSP 1 | 2    | 2    | 1    | 1    | 1    | 1    | 1    | 1    | 1    | 1    |
| SSP 2 | 2    | 2    | 2    | 1    | 1    | 1    | 1    | 1    | 1    | 1    |
| SSP 3 | 2    | 2    | 2    | 2    | 1    | 1    | 1    | 1    | 1    | 1    |
| SSP 4 | 2    | 2    | 1    | 1    | 1    | 1    | 1    | 1    | 1    | 1    |
| SSP 5 | 2    | 2    | 1    | 1    | 1    | 1    | 1    | 1    | 1    | 1    |

(2 – steadily urbanizing; 1 – urbanized)

**Supplementary Table 4. Number of global countries following different urbanization styles in different scenarios.**

|                     | base year | SSP 2 |      | SSP 5 |      | SSP 1 |      |
|---------------------|-----------|-------|------|-------|------|-------|------|
|                     | 2000      | 2050  | 2100 | 2050  | 2100 | 2050  | 2100 |
| urbanized           | 113       | 179   | 208  | 205   | 214  | 188   | 214  |
| steadily urbanizing | 95        | 52    | 23   | 8     | 0    | 26    | 0    |
| rapidly urbanizing  | 23        | 0     | 0    | 18    | 17   | 17    | 17   |

**Supplementary Table 5. Urban land expansion of sample countries over the 21st century.**

|                          | Base Year 2000                      |                                         | Middle of Road Scenario: 2000-2100 Change    |                                            |                     |                    |                    |              | 2100/2000 urban land ratio (range across scenarios) |
|--------------------------|-------------------------------------|-----------------------------------------|----------------------------------------------|--------------------------------------------|---------------------|--------------------|--------------------|--------------|-----------------------------------------------------|
|                          | total urban land (km <sup>2</sup> ) | per capita urban land (m <sup>2</sup> ) | per capita urban land 2100 (m <sup>2</sup> ) | total urban land change (km <sup>2</sup> ) | urban land change % | total pop change % | urban pop change % | GDP change % |                                                     |
| United States of America | 123,957                             | 436                                     | 713                                          | 202,970                                    | 164                 | 61                 | 97                 | 268          | 1.4 - 4.6                                           |
| Brazil                   | 17,766                              | 102                                     | 237                                          | 26,912                                     | 151                 | 8                  | 26                 | 648          | 1.3 - 4.5                                           |
| Germany                  | 24,220                              | 290                                     | 1,048                                        | 45,514                                     | 188                 | -20                | 2                  | 182          | 1.5 - 4.8                                           |
| United Kingdom           | 12,892                              | 219                                     | 401                                          | 21,064                                     | 163                 | 44                 | 71                 | 397          | 1.3 - 4.4                                           |
| Russia                   | 21,533                              | 147                                     | 490                                          | 38,492                                     | 179                 | -16                | 6                  | 639          | 1.5 - 4.7                                           |
| Ethiopia                 | 1,086                               | 16                                      | 63                                           | 10,993                                     | 1,012               | 189                | 1,096              | 23,326       | 5.7 - 17.1                                          |
| South Africa             | 11,148                              | 249                                     | 630                                          | 25,700                                     | 231                 | 30                 | 98                 | 1,004        | 1.7 - 5.3                                           |
| China                    | 73,492                              | 57                                      | 552                                          | 350,290                                    | 477                 | -40                | 35                 | 1,658        | 2.4 - 8.6                                           |
| India                    | 21,631                              | 21                                      | 97                                           | 134,480                                    | 622                 | 54                 | 313                | 4,535        | 3.3 - 10.2                                          |

**Supplementary Table 6. Comparing 2000-2100 urban land expansion (ULE) % and total population change (TPC) % for world regions across scenarios.**

|                            | SSP1 |      | SSP2 |      | SSP3 |      | SSP4 |      | SSP5 |      |
|----------------------------|------|------|------|------|------|------|------|------|------|------|
|                            | ULE% | TPC% | ULE% | TPC% | ULE% | TPC% | ULE% | TPC% | ULE% | TPC% |
| North America              | 42   | 65   | 164  | 63   | 47   | -8   | 163  | 29   | 360  | 154  |
| South & Central America    | 48   | -7   | 166  | 28   | 58   | 106  | 166  | 8    | 386  | -14  |
| Europe                     | 61   | -3   | 191  | 0    | 85   | -32  | 192  | -23  | 404  | 40   |
| Russia                     | 48   | -37  | 179  | -16  | 74   | 2    | 171  | -40  | 373  | -31  |
| North Africa & Middle East | 67   | 42   | 222  | 94   | 104  | 206  | 206  | 116  | 427  | 44   |
| Africa                     | 155  | 154  | 419  | 260  | 238  | 438  | 341  | 419  | 701  | 147  |
| East & Central Asia        | 121  | -35  | 396  | -18  | 214  | 15   | 326  | -18  | 652  | -34  |
| South & Southeast Asia     | 175  | 4    | 461  | 42   | 300  | 124  | 406  | 14   | 741  | 2    |
| Oceania                    | 40   | 96   | 158  | 114  | 46   | 60   | 155  | 103  | 358  | 192  |
| Global Total               | 84   | 13   | 263  | 47   | 129  | 107  | 238  | 51   | 491  | 21   |
